# Supplementary material
Source: HighWire-hosted journal article supplement (https://www.cmajopen.ca/highwire/filestream/80855/field_highwire_adjunct_files/0/open-2015-0110-original-submission.pdf)
Supplement: open-2015-0110-original-submission.pdf [file open-2015-0110-original-submission.pdf]

1  
2  
3 **Title:** Predictors of diagnostic neuroimaging delays in adult Ontario patients presenting  
4 with symptoms suggestive of acute stroke  
5  
6  
7  
8  
9  
10

11  
12 **Manuscript type:** original research  
13  
14  
15  
16

17 Kirsteen R. Burton MSc MD<sup>1,2</sup>, Moira K. Kapral MSc MD<sup>1,3</sup>, Shudong Li PhD<sup>4</sup>, Jiming  
18 Fang PhD<sup>4</sup>, Alan R Moody MBChB<sup>2,5</sup>, Murray Krahn MSc MD<sup>1,3</sup>, Andreas Laupacis MSc  
19 MD<sup>1,3</sup>  
20  
21  
22  
23  
24  
25  
26

- 27 1. Institute of Health Policy, Management and Evaluation, University of Toronto, Toronto,  
28 ON, Canada.
- 29 2. Department of Medical Imaging, University of Toronto, Toronto, ON, Canada.
- 30 3. Department of Medicine, University of Toronto, Toronto, ON, Canada.
- 31 4. Institute for Clinical Evaluative Sciences, Toronto, ON, Canada.
- 32 5. Institute of Medical Sciences, University of Toronto, Toronto, ON, Canada.
- 33
- 34
- 35
- 36
- 37
- 38
- 39
- 40
- 41
- 42
- 43
- 44
- 45
- 46
- 47
- 48
- 49
- 50
- 51
- 52
- 53
- 54
- 55
- 56
- 57
- 58
- 59
- 60

**Abstract:**

**Background:** To evaluate factors associated with delay of neuroimaging (computed tomography or magnetic resonance imaging of the brain) in patients with suspected acute stroke.

**Methods:** Prospective cohort study of all patients older than 18 years with suspected acute stroke seen at hospitals with neuroimaging capacity within the Ontario Stroke Registry between April 1, 2010 and March 31, 2011. We used a hierarchical, multivariable Cox proportional hazards model to evaluate the association between patient and institution factors and the likelihood of receiving neuroimaging within 25 minutes of arrival in the emergency department (ED).

**Results:** From a cohort of 13,250 patients who presented to an ED with stroke-like symptoms, 3,984 patients arrived within four hours of symptom onset. In these patients neuroimaging was performed within 25 minutes of presentation in 27.3%. The following variables were independently associated with a greater likelihood of neuroimaging completion within 25 minutes of presentation: less time from symptom onset to presentation; more severe stroke; male gender; no past history of stroke or transient ischemic attack (TIA); arrival to hospital from a setting other than home; presentation to a designated stroke centre or an urban hospital.

1  
2  
3 **Interpretation:** In Ontario, Canada, a minority of patients with stroke-like symptoms  
4  
5 who present within the four-hour thrombolytic treatment window receive timely  
6  
7 neuroimaging. Neuroimaging delays are influenced by an array of patient and hospital  
8  
9 factors, some of which are modifiable.  
10  
11  
12  
13  
14  
15  
16  
17  
18  
19  
20  
21  
22  
23  
24  
25  
26  
27  
28  
29  
30  
31  
32  
33  
34  
35  
36  
37  
38  
39  
40  
41  
42  
43  
44  
45  
46  
47  
48  
49  
50  
51  
52  
53  
54  
55  
56  
57  
58  
59  
60

Confidential

**Introduction:**

Timely access to diagnostic neuroimaging is critical to the management of patients with suspected acute ischemic stroke. Thrombolysis with intravenous tissue plasminogen activator can reduce the risk of disability after stroke, but must be administered within 4.5 hours of stroke onset, and must be preceded by brain imaging to confirm eligibility for thrombolysis.(1) Stroke guidelines developed by the Brain Attack Coalition and the American Heart Association advise the completion of computed tomography (CT) imaging within 25 minutes of arrival to the emergency department,(2-4) while the Canadian Best Practice Recommendations for Stroke Care note that patients with suspected acute stroke or transient ischemic attack (TIA) should receive neuroimaging immediately.(5-9)

Numerous studies have examined the relationship between stroke symptom onset-to-door time and door-to-thrombolysis time (frequently termed “door-to-needle” time).(10-15) However, fewer studies have investigated the door-to-imaging time—one of the first time windows in the management of acute stroke patients—and there is little information on factors associated with delays in brain imaging.(16)

We undertook this study to assess the timing of neuroimaging (CT or magnetic resonance (MR) of the brain) in patients with symptoms suggestive of acute stroke who presented to Ontario hospitals with neuroimaging capacity. We determined the proportion of patients who presented within 4 hours of stroke onset (and thus were

1  
2  
3 potentially eligible for intravenous thrombolysis) who underwent neuroimaging within 25  
4  
5 minutes of arrival, and identified factors that predicted the likelihood of neuroimaging  
6  
7 within this time.  
8  
9

## 10 11 12 13 14 15 **Methods:**

### 16 17 18 19 ***Data sources:***

20  
21 The Ontario Stroke Registry (formerly known as the Registry of the Canadian Stroke  
22  
23 Network (RCSN)) performs a biennial audit of patients with suspected stroke or TIA  
24  
25 seen in the ED or admitted to hospital at any acute care institution in the province of  
26  
27 Ontario, Canada, excluding psychiatric hospitals. Chart abstraction is performed by  
28  
29 specially trained neurology research personnel, and includes abstraction of important  
30  
31 timing variables including time of stroke onset, time of ED arrival and time of first brain  
32  
33 imaging.(17) We used data from the audit performed in fiscal year 2010/2011 and only  
34  
35 included those hospitals that had neuroimaging capacity, defined as having CT or MRI  
36  
37 on-site.  
38  
39  
40  
41  
42  
43  
44

### 45 46 ***Setting:***

47  
48 Data were collected from Ontario hospitals which were categorized as follows: 1)  
49  
50 regional stroke centre; 2) district stroke centre; and 3) non-designated hospital.  
51  
52 Regional stroke centres are those which use written stroke protocols for emergency  
53  
54 services and within the emergency department ED. Additionally, they can offer CT  
55  
56  
57  
58  
59  
60

1  
2  
3 neuroimaging, clinicians with stroke expertise and neurosurgical/neurointerventional  
4 radiology facilities and have resources similar to those found in American  
5  
6 comprehensive stroke centres. District stroke centres share the features of regional  
7  
8 stroke centres, but do not have onsite neurosurgical/neurointerventional radiology  
9  
10 facilities, and are similar to American primary stroke centres. Non-designated hospitals  
11  
12 are those which do not fit the definition of a regional nor district stroke centre but still  
13  
14 have neuroimaging capability.  
15  
16  
17  
18  
19  
20

### 21 22 ***Study population:***

23  
24 We excluded patients who were less than 18 years of age, had duplicate records, died  
25  
26 prior to receipt of neuroimaging or were transferred from another hospital. We also  
27  
28 excluded patients where the exact time of stroke symptom onset was unknown. In  
29  
30 order to limit our analyses to patients in whom rapid brain imaging would guide  
31  
32 decisions about eligibility for thrombolysis, we excluded patients who presented to  
33  
34 hospital more than four hours after symptom onset.  
35  
36  
37  
38  
39  
40

### 41 42 ***Statistical analysis:***

43  
44 The characteristics of patients who received and did not receive neuroimaging were  
45  
46 compared using chi-square tests for categorical variables and t-tests for continuous  
47  
48 variables. When the National Institutes of Health Stroke Scale (NIHSS) score was  
49  
50 missing, a formula was used to convert the Canadian Neurological Score to the NIHSS  
51  
52 score.(18) We created a hierarchical Cox proportional hazards model to estimate the  
53  
54 effect of time from presentation to neuroimaging and demographic, medical history,  
55  
56  
57  
58  
59  
60

1  
2  
3 patient presentation and hospital factors on the receipt of neuroimaging. (See Table 1  
4 for a detailed list of these variables.) To account for clustering by hospital type, we  
5 performed a random effects, multilevel (two-level) regression analysis with patients  
6 being level one units and hospitals level two units in the model. The chi-square test was  
7 used for model hypothesis testing. We reported adjusted hazard ratios (AHRs) with 95%  
8 confidence intervals. Analyses were performed using SAS statistical software (version  
9 9.3, SAS Institute Inc., Cary, NC). P-values less than 0.05 were considered statistically  
10 significant and all p-values were based on two-tailed tests.  
11  
12  
13  
14  
15  
16  
17  
18  
19  
20  
21  
22  
23  
24  
25  
26

## 27 **Results:**

28  
29  
30  
31 In 2010/11, 13,250 were enrolled in the Ontario Stroke Registry. After applying the  
32 exclusion criteria, our study cohort consisted of 3,984 patients. Of these, neuroimaging  
33 was completed within 25 minutes of presentation in 27.3% of patients; 94.0% of these  
34 examinations were CT and 6.0% were MR. The greatest proportion of patients who  
35 received neuroimaging within 25 minutes were those who presented to the ED within 30  
36 to 60 minutes of symptom onset. (Figure 1) The mean time to neuroimaging was 1.49  
37 hours (standard deviation, 0.89 hours). On univariate analyses, many factors were  
38 associated with receipt of neuroimaging within 25 minutes of presentation in the ED.  
39  
40  
41  
42  
43  
44  
45  
46  
47  
48  
49

50 (Table 1)  
51  
52  
53  
54  
55  
56  
57  
58  
59  
60

1  
2  
3 On multivariable analysis, patients who were male, who had a greater stroke severity on  
4 presentation, who had less time from symptom onset to ED presentation, who had no  
5 history of stroke, who arrived at the hospital from a site other than home (e.g., nursing  
6 home or continuing care facility), who presented to a hospital that was designated a  
7 district or regional stroke centre or was located in an urban setting, were more likely to  
8 receive neuroimaging within 25 minutes of presentation to the ED. (Table 2)  
9  
10  
11  
12  
13  
14  
15  
16  
17  
18  
19  
20  
21

## 22 Discussion:

23  
24  
25  
26  
27 Of the 3,984 patients in Ontario who presented to an ED within four hours of symptom  
28 onset (i.e. within a time where neuroimaging could have reasonably been performed  
29 and the patient would have remained within the 4.5-hour thrombolytic treatment  
30 window), neuroimaging was only performed within 25 minutes in 27.3% of patients.  
31  
32  
33

34 These results suggest that the management of some patients with acute ischemic  
35 stroke is suboptimal, and may contributor to otherwise eligible patients not receiving  
36 thrombolytic or endovascular therapy.  
37  
38  
39  
40  
41  
42  
43  
44  
45

46 Few prior studies have examined neuroimaging rates among patients with suspected  
47 acute stroke. A study from the United States found that 41.7% of patients with  
48 suspected stroke underwent neuroimaging within 25 minutes of hospital arrival;  
49 however their study sample was limited to patients who had symptom onset less than or  
50 equal to two hours before ED arrival.(19) This reflected the previous recommendation of  
51  
52  
53  
54  
55  
56  
57  
58  
59  
60



1  
2  
3 a three hour thrombolysis administration window.(19) A number of other studies also  
4 examined neuroimaging rates in patients with acute ischemic stroke, or patients who  
5 presented with stroke-like symptoms (20-23). However, they restricted their study  
6 sample to patients who ultimately received thrombolytic therapy,(20) (21) or estimated  
7 rates of imaging within 25 minutes among patients who presented either up to 2.0 or 4.5  
8 hours after symptom onset. (19,22,23)  
9  
10  
11  
12  
13  
14  
15  
16  
17  
18  
19

20 We identified a number of factors that were independently associated with  
21 neuroimaging delays. Patients who presented to a rural hospital with imaging capacity  
22 were less likely than those presenting to urban hospitals to receive neuroimaging within  
23 25 minutes of presentation. This finding is consistent with previous studies suggesting  
24 that patients seen at rural centres are less likely to receive neuroimaging (24), use  
25 emergency medical services,(25) or be treated with intravenous thrombolysis;(26) and  
26 that hospitals with greater volumes of stroke patients have increased rates of  
27 neuroimaging.(27) Although we found that patients who presented to designated stroke  
28 centers were more likely to receive timely neuroimaging than those seen at other  
29 centers, the proportion of patients receiving neuroimaging within 25 minutes was still  
30 surprisingly low at 29.1% within regional stroke centres.  
31  
32  
33  
34  
35  
36  
37  
38  
39  
40  
41  
42  
43  
44  
45  
46  
47

48 Patients who presented with less severe symptoms (based on the NIHSS score on  
49 presentation) were more likely than those with more severe stroke symptoms to  
50 experience a neuroimaging delay. These findings are consistent with other studies  
51 which found that patients with a NIHSS score less than or equal to four had an  
52  
53  
54  
55  
56  
57  
58  
59  
60

1  
2  
3 increased door-to-needle time,(12) and that patients with more severe stroke at  
4 presentation were more likely to receive neuroimaging within 25 minutes.(19) Possible  
5 explanations for these findings include a lower diagnostic suspicion for stroke when  
6 patient symptoms are milder, or that patients with milder symptoms were deemed not to  
7 be candidates for thrombolytic therapy. Patients who had a shorter time from symptom  
8 onset to ED presentation received neuroimaging most rapidly. This is in contrast to  
9 earlier studies which reported a “neuroimaging paradox”, where patients who presented  
10 earlier experienced delayed neuroimaging or time to initiation of thrombolytic  
11 therapy.(10,12,15,19,28-30)  
12  
13  
14  
15  
16  
17  
18  
19  
20  
21  
22  
23  
24  
25  
26

27 We found that women presenting with stroke-like symptoms were less likely to receive  
28 timely neuroimaging, which is similar to four other studies, one of which also found a  
29 delay in door-to-doctor time(19,31-33). In our study, age and socioeconomic status did  
30 not impact neuroimaging time, in contrast to a study conducted in the United States  
31 (18). It is possible that Ontario’s universal public coverage of hospital care accounts for  
32 this difference.  
33  
34  
35  
36  
37  
38  
39  
40  
41  
42

43 Our results suggest an urgent need to focus on decreasing neuroimaging time in  
44 patients who present with acute stroke in Ontario, in keeping with recent  
45 recommendations to shift ischemic stroke policy focus from extending the time window  
46 for thrombolytic therapy, to providing more rapid treatment.(34). This should be part of  
47 an overall quality improvement initiative such as that suggested by Sauser et al.,  
48 wherein neuroimaging time was one of ten evidence-based strategies to increase the  
49  
50  
51  
52  
53  
54  
55  
56  
57  
58  
59  
60

1  
2  
3 likelihood of timely reperfusion.(20) Recent studies have reported significant  
4  
5 improvement in door-to-imaging performance with the adoption of these  
6  
7 initiatives.(20,35,36) Of note, Ontario has a regional system of stroke care,(37) which  
8  
9 already endorses many interventions designed to facilitate timely reperfusion, including  
10  
11 pre-notification of a suspected stroke by emergency medical services to the receiving  
12  
13 hospital, formation of acute stroke teams, stroke-specific medical order sets, and  
14  
15 encouragement of direct transfer of patients from the emergency department triage area  
16  
17 to the scanner, where possible.  
18  
19  
20  
21

22  
23  
24 The principle strengths of our study are the large, population-based study sample,  
25  
26 complete and high quality data, statistical analyses accounting for the hierarchical  
27  
28 nature of the data, and the fact that patients were managed after the publication of  
29  
30 recent stroke guidelines.(38) The primary limitation of our study is, as with any  
31  
32 observational study, the potential influence of confounding variables. The OSA did not  
33  
34 collect information about some variables that might impact time to neuroimaging such  
35  
36 as patient preferences, the effect of stroke on the ability to communicate, any advanced  
37  
38 care directives that existed, and emergency department overcrowding.  
39  
40  
41  
42  
43  
44

45  
46 In summary, we found that only a minority of patients with acute stroke received timely  
47  
48 neuroimaging in Ontario in 2010/2011. There is an urgent need for quality improvement  
49  
50 initiatives to address this issue, as a means of increasing the number of patients with  
51  
52 acute stroke who receive appropriate revascularization therapy.  
53  
54  
55  
56  
57  
58  
59  
60

**Table 1: Characteristics of patients who arrived to an ED within 4 hours of symptom onset and did and did not receive neuroimaging within 25 minutes**

| Variable                                           | Value     | Total<br>(n=3,984) | Timely<br>Neuroimaging<br>(n=1,087) | Delayed<br>Neuroimaging<br>(n=2,897) | P-<br>value |
|----------------------------------------------------|-----------|--------------------|-------------------------------------|--------------------------------------|-------------|
| Time from symptom onset to ED presentation (hours) | Mean ± SD | 1.49 ± 0.89        | 1.33 ± 0.75                         | 1.55 ± 0.93                          | <.001       |
| Time from symptom onset group (hours)              | 0.0-0.5   | 280                | 64 (22.9%)                          | 216 (77.1%)                          | <.001       |
|                                                    | >0.5-1.0  | 1,245              | 399 (32.0%)                         | 846 (68.0%)                          |             |
|                                                    | >1.0-1.5  | 939                | 273 (29.1%)                         | 666 (70.9%)                          |             |
|                                                    | >1.5-2.0  | 580                | 169 (29.1%)                         | 411 (70.9%)                          |             |
|                                                    | >2.0-3.0  | 585                | 132 (22.6%)                         | 453 (77.4%)                          |             |
|                                                    | >3.0-4.0  | 355                | 50 (14.1%)                          | 305 (85.9%)                          |             |
| Age group (years)                                  | 18-44     | 149                | 38 (25.5%)                          | 111 (74.5%)                          | 0.715       |
|                                                    | 45-64     | 985                | 282 (28.6%)                         | 703 (71.4%)                          |             |
|                                                    | 65-79     | 1,446              | 391 (27.0%)                         | 1,055 (73.0%)                        |             |
|                                                    | >=80      | 1,404              | 376 (26.8%)                         | 1,028 (73.2%)                        |             |
| NIHSS score                                        | NIHSS≤4   | 2,352              | 383 (16.3%)                         | 1,969 (83.7%)                        | <.001       |
|                                                    | NIHSS>4   | 1,348              | 642 (47.6%)                         | 706 (52.4%)                          |             |

|                              |             |       |               |               |       |
|------------------------------|-------------|-------|---------------|---------------|-------|
|                              | Missing     | 284   | 62 (21.8%)    | 222 (78.2%)   |       |
| Gender                       | Female      | 1,947 | 484 (24.9%)   | 1,463 (75.1%) | <.001 |
|                              | Male        | 2,037 | 603 (29.6%)   | 1,434 (70.4%) |       |
| Income quintile              | 1 (lowest)  | 785   | 202 (25.7%)   | 583 (74.3%)   | 0.830 |
|                              | 2           | 799   | 219 (27.4%)   | 580 (72.6%)   |       |
|                              | 3           | 778   | 216 (27.8%)   | 562 (72.2%)   |       |
|                              | 4           | 791   | 224 (28.3%)   | 567 (71.7%)   |       |
|                              | 5 (highest) | 831   | 226 (27.2%)   | 605 (72.8%)   |       |
| Preferred language           | English     | 3,509 | 926 (26.4%)   | 2,583 (73.6%) | 0.002 |
|                              | Other       | 383   | 132 (34.5%)   | 251 (65.5%)   |       |
|                              | UTD         | 92    | 29 (31.5%)    | 63 (68.5%)    |       |
| Pre-admission independence   | No          | 1,117 | 278 (24.9%)   | 839 (75.1%)   | 0.034 |
|                              | Yes         | 2,867 | 809 (28.2%)   | 2,058 (71.8%) |       |
| <b>Past medical history:</b> |             |       |               |               |       |
| Stroke, TIA, ICH             | No          | 2,789 | 810 (29.0%)   | 1,979 (71.0%) | <.001 |
|                              | Yes         | 1,195 | 277 (23.2%)   | 918 (76.8%)   |       |
| Carotid revascularization    | No          | 3,935 | 1,073 (27.3%) | 2,862 (72.7%) | 0.839 |
|                              | Yes         | 49    | 14 (28.6%)    | 35 (71.4%)    |       |
| Diabetes mellitus            | No          | 3,084 | 834 (27.0%)   | 2,250 (73.0%) | 0.527 |
|                              | Yes         | 900   | 253 (28.1%)   | 647 (71.9%)   |       |

|    |                         |                        |       |             |               |       |
|----|-------------------------|------------------------|-------|-------------|---------------|-------|
| 1  |                         |                        |       |             |               |       |
| 2  |                         |                        |       |             |               |       |
| 3  | Hypertension            | No                     | 1,332 | 326 (24.5%) | 1,006 (75.5%) | 0.005 |
| 4  |                         |                        |       |             |               |       |
| 5  |                         | Yes                    | 2,652 | 761 (28.7%) | 1,891 (71.3%) |       |
| 6  |                         |                        |       |             |               |       |
| 7  |                         |                        |       |             |               |       |
| 8  | Hyperlipidemia          | No                     | 2,333 | 618 (26.5%) | 1,715 (73.5%) | 0.181 |
| 9  |                         |                        |       |             |               |       |
| 10 |                         | Yes                    | 1,651 | 469 (28.4%) | 1,182 (71.6%) |       |
| 11 |                         |                        |       |             |               |       |
| 12 |                         |                        |       |             |               |       |
| 13 | Dementia                | No                     | 3,660 | 999 (27.3%) | 2,661 (72.7%) | 0.958 |
| 14 |                         |                        |       |             |               |       |
| 15 |                         | Yes                    | 324   | 88 (27.2%)  | 236 (72.8%)   |       |
| 16 |                         |                        |       |             |               |       |
| 17 |                         |                        |       |             |               |       |
| 18 | Other cardiovascular    | No                     | 2,831 | 732 (25.9%) | 2,099 (74.1%) | 0.002 |
| 19 | disease                 |                        |       |             |               |       |
| 20 |                         |                        |       |             |               |       |
| 21 |                         | Yes                    | 1,153 | 355 (30.8%) | 798 (69.2%)   |       |
| 22 |                         |                        |       |             |               |       |
| 23 |                         |                        |       |             |               |       |
| 24 | <b>Presentation</b>     |                        |       |             |               |       |
| 25 |                         |                        |       |             |               |       |
| 26 | <b>characteristics:</b> |                        |       |             |               |       |
| 27 |                         |                        |       |             |               |       |
| 28 | Business hours          | No                     | 2,552 | 714 (28.0%) | 1,838 (72.0%) | 0.189 |
| 29 |                         |                        |       |             |               |       |
| 30 |                         | Yes                    | 1,432 | 373 (26.0%) | 1,059 (74.0%) |       |
| 31 |                         |                        |       |             |               |       |
| 32 |                         |                        |       |             |               |       |
| 33 | Arrived to hospital     | Home                   | 3,539 | 972 (27.5%) | 2,567 (72.5%) | 0.021 |
| 34 | from                    |                        |       |             |               |       |
| 35 |                         |                        |       |             |               |       |
| 36 |                         | Nursing, retirement    | 327   | 95 (29.1%)  | 232 (70.9%)   |       |
| 37 |                         |                        |       |             |               |       |
| 38 |                         | home or complex        |       |             |               |       |
| 39 |                         |                        |       |             |               |       |
| 40 |                         | continuing care        |       |             |               |       |
| 41 |                         |                        |       |             |               |       |
| 42 |                         |                        |       |             |               |       |
| 43 |                         | Other                  | 14    | <=5 (35.7%) | 9 (64.3%)     |       |
| 44 |                         |                        |       |             |               |       |
| 45 |                         |                        |       |             |               |       |
| 46 |                         | Missing or UTD         | 104   | 15 (14.4%)  | 89 (85.6%)    |       |
| 47 |                         |                        |       |             |               |       |
| 48 |                         |                        |       |             |               |       |
| 49 | <b>Hospital</b>         |                        |       |             |               |       |
| 50 |                         |                        |       |             |               |       |
| 51 | <b>characteristics:</b> |                        |       |             |               |       |
| 52 |                         |                        |       |             |               |       |
| 53 | Type                    | Regional stroke centre | 1,798 | 523 (29.1%) | 1,275 (70.9%) | <.001 |
| 54 |                         |                        |       |             |               |       |
| 55 |                         | District stroke centre | 1,404 | 521 (37.1%) | 883 (62.9%)   |       |
| 56 |                         |                        |       |             |               |       |
| 57 |                         |                        |       |             |               |       |
| 58 |                         |                        |       |             |               |       |
| 59 |                         |                        |       |             |               |       |
| 60 |                         |                        |       |             |               |       |

1  
2  
3  
4  
5  
6  
7  
8  
9  
10  
11  
12  
13  
14  
15  
16  
17  
18  
19  
20  
21  
22  
23  
24  
25  
26  
27  
28  
29  
30  
31  
32  
33  
34  
35  
36  
37  
38  
39  
40  
41  
42  
43  
44  
45  
46  
47  
48  
49  
50  
51  
52  
53  
54  
55  
56  
57  
58  
59  
60

|                      |                     |       |               |               |       |
|----------------------|---------------------|-------|---------------|---------------|-------|
|                      | Not a stroke centre | 782   | 43 (5.5%)     | 739 (94.5%)   |       |
| Rural hospital       | N                   | 3,785 | 1,081 (28.6%) | 2,704 (71.4%) | <.001 |
|                      | Y                   | 199   | 6 (3.0%)      | 193 (97.0%)   |       |
| Annual stroke volume | High (>200)         | 3,341 | 1,005 (30.1%) | 2,336 (69.9%) | <.001 |
|                      | Medium(101-200)     | 375   | 65 (17.3%)    | 310 (82.7%)   |       |
|                      | Low (0-100)         | 268   | 17 (6.3%)     | 251 (93.7%)   |       |

---

**Legend:** SD=standard deviation; IQR=interquartile range; NIHSS=National Institutes of Health Stroke Score; UTD=unable to determine; TIA=transient ischemic attack; ICH=intracranial hemorrhage; <=5: cell value suppressed for reasons of privacy and confidentiality; “rural hospital” is defined as one located in a community with a population < 10,000 persons.

**Table 2: Multivariable analysis of receipt of neuroimaging within 25 minutes in patients presenting within 4 hours of stroke symptoms**

| Variable                                           | Value            | Hazard Ratio | HR Lower 95% CI | HR Upper 95% CI | P-value |
|----------------------------------------------------|------------------|--------------|-----------------|-----------------|---------|
| Time from symptom onset to ED presentation (hours) | <0.5 (ref)       | 1.00         |                 |                 | <0.0001 |
|                                                    | 0.5-<1.0         | 1.59         | 1.21            | 2.08            |         |
|                                                    | 1.0-<1.5         | 1.55         | 1.18            | 2.05            |         |
|                                                    | 1.5-<2.0         | 1.37         | 1.02            | 1.84            |         |
|                                                    | 2.0-<3.0         | 1.31         | 0.96            | 1.77            |         |
|                                                    | 3.0-4.0          | 0.81         | 0.56            | 1.19            |         |
| Age group (years)                                  | >=80 (ref)       | 1.00         |                 |                 | 0.40    |
|                                                    | 18-44            | 1.13         | 0.79            | 1.61            |         |
|                                                    | 45-64            | 1.16         | 0.98            | 1.39            |         |
|                                                    | 65-79            | 1.06         | 0.91            | 1.24            |         |
| NIHSS score                                        | NIHSS<=4 (ref)   | 1.00         |                 |                 | <0.0001 |
|                                                    | NIHSS>4          | 3.54         | 3.09            | 4.05            |         |
|                                                    | Missing          | 2.21         | 1.61            | 3.05            |         |
| Gender                                             | Male (ref)       | 1.00         |                 |                 |         |
|                                                    | Female           | 0.76         | 0.67            | 0.86            | <0.0001 |
| Income quintile                                    | 1 (lowest) (ref) | 1.00         |                 |                 | 0.43    |
|                                                    | 2                | 1.10         | 0.91            | 1.34            |         |
|                                                    | 3                | 1.19         | 0.97            | 1.45            |         |
|                                                    | 4                | 1.15         | 0.94            | 1.40            |         |
|                                                    | 5 (highest)      | 1.18         | 0.97            | 1.44            |         |



|    |                                      |                             |      |      |        |
|----|--------------------------------------|-----------------------------|------|------|--------|
| 1  |                                      |                             |      |      |        |
| 2  |                                      |                             |      |      |        |
| 3  | Preferred language                   | English (ref)               | 1.00 |      | 0.50   |
| 4  |                                      |                             |      |      |        |
| 5  |                                      | Other                       | 1.06 | 0.86 | 1.30   |
| 6  |                                      |                             |      |      |        |
| 7  |                                      | UTD                         | 0.82 | 0.55 | 1.22   |
| 8  |                                      |                             |      |      |        |
| 9  | Pre-admission independence           | Yes (ref)                   | 1.00 |      | 0.07   |
| 10 |                                      |                             |      |      |        |
| 11 |                                      | No                          | 0.85 | 0.72 | 1.01   |
| 12 |                                      |                             |      |      |        |
| 13 | <b>Past medical history:</b>         |                             |      |      |        |
| 14 |                                      |                             |      |      |        |
| 15 | Stroke, TIA, ICH                     | No (ref)                    | 1.00 |      | <0.001 |
| 16 |                                      |                             |      |      |        |
| 17 |                                      | Yes                         | 0.78 | 0.67 | 0.89   |
| 18 |                                      |                             |      |      |        |
| 19 | Carotid therapy                      | No (ref)                    | 1.00 |      | 0.13   |
| 20 |                                      |                             |      |      |        |
| 21 |                                      | Yes                         | 0.66 | 0.38 | 1.13   |
| 22 |                                      |                             |      |      |        |
| 23 | Diabetes mellitus                    | No (ref)                    | 1.00 |      | 0.55   |
| 24 |                                      |                             |      |      |        |
| 25 |                                      | Yes                         | 0.96 | 0.82 | 1.10   |
| 26 |                                      |                             |      |      |        |
| 27 | Hypertension                         | No (ref)                    | 1.00 |      | 0.18   |
| 28 |                                      |                             |      |      |        |
| 29 |                                      | Yes                         | 1.11 | 0.95 | 1.28   |
| 30 |                                      |                             |      |      |        |
| 31 | Hyperlipidemia                       | No (ref)                    | 1.00 |      | 0.91   |
| 32 |                                      |                             |      |      |        |
| 33 |                                      | Yes                         | 1.01 | 0.88 | 1.15   |
| 34 |                                      |                             |      |      |        |
| 35 | Dementia                             | No (ref)                    | 1.00 |      | 0.66   |
| 36 |                                      |                             |      |      |        |
| 37 |                                      | Yes                         | 0.95 | 0.74 | 1.21   |
| 38 |                                      |                             |      |      |        |
| 39 | Other cardiovascular disease         | No (ref)                    | 1.00 |      | 0.26   |
| 40 |                                      |                             |      |      |        |
| 41 |                                      | Yes                         | 1.08 | 0.94 | 1.24   |
| 42 |                                      |                             |      |      |        |
| 43 | <b>Presentation characteristics:</b> |                             |      |      |        |
| 44 |                                      |                             |      |      |        |
| 45 | Business hours                       | Yes (ref)                   | 1.00 |      | 0.29   |
| 46 |                                      |                             |      |      |        |
| 47 |                                      | No                          | 1.07 | 0.94 | 1.22   |
| 48 |                                      |                             |      |      |        |
| 49 | Arrived to hospital from             | Home (ref)                  | 1.00 |      | 0.01   |
| 50 |                                      |                             |      |      |        |
| 51 |                                      | Nursing, retirement home or | 1.21 | 0.94 | 1.56   |
| 52 |                                      |                             |      |      |        |
| 53 |                                      | complex continuing care     |      |      |        |
| 54 |                                      |                             |      |      |        |
| 55 |                                      | Other                       | 1.90 | 0.77 | 4.67   |
| 56 |                                      |                             |      |      |        |
| 57 |                                      |                             |      |      |        |
| 58 |                                      |                             |      |      |        |
| 59 |                                      |                             |      |      |        |
| 60 |                                      |                             |      |      |        |

1  
2  
3  
4  
5  
6  
7  
8  
9  
10  
11  
12  
13  
14  
15  
16  
17  
18  
19  
20  
21  
22  
23  
24  
25  
26  
27  
28  
29  
30  
31  
32  
33  
34  
35  
36  
37  
38  
39  
40  
41  
42  
43  
44  
45  
46  
47  
48  
49  
50  
51  
52  
53  
54  
55  
56  
57  
58  
59  
60

Missing or UTD 0.44 0.24 0.81

**Hospital characteristics:**

|                      |                           |      |      |       |         |
|----------------------|---------------------------|------|------|-------|---------|
| Type                 | Not a stroke centre (ref) | 1.00 |      |       | <0.0001 |
|                      | Regional stroke centre    | 5.60 | 2.70 | 11.62 |         |
|                      | District stroke centre    | 6.78 | 3.66 | 12.56 |         |
| Rural hospital       | N (ref)                   | 1.00 |      |       | <0.001  |
|                      | Y                         | 0.08 | 0.02 | 0.36  |         |
| Annual stroke volume | High (>200) (ref)         | 1.00 |      |       | 0.14    |
|                      | Medium (101-200)          | 1.06 | 0.54 | 2.05  |         |
|                      | Low (0-100)               | 2.73 | 1.00 | 7.47  |         |

**Legend:** HR=hazard ratio; CL=confidence limit; ref=reference; NIHSS=National Institutes of Health Stroke Score; UTD=unable to determine; TIA=transient ischemic attack; ICH=intracranial hemorrhage.

Confidential

## Appendix A: Flow diagram for patient cohort\*

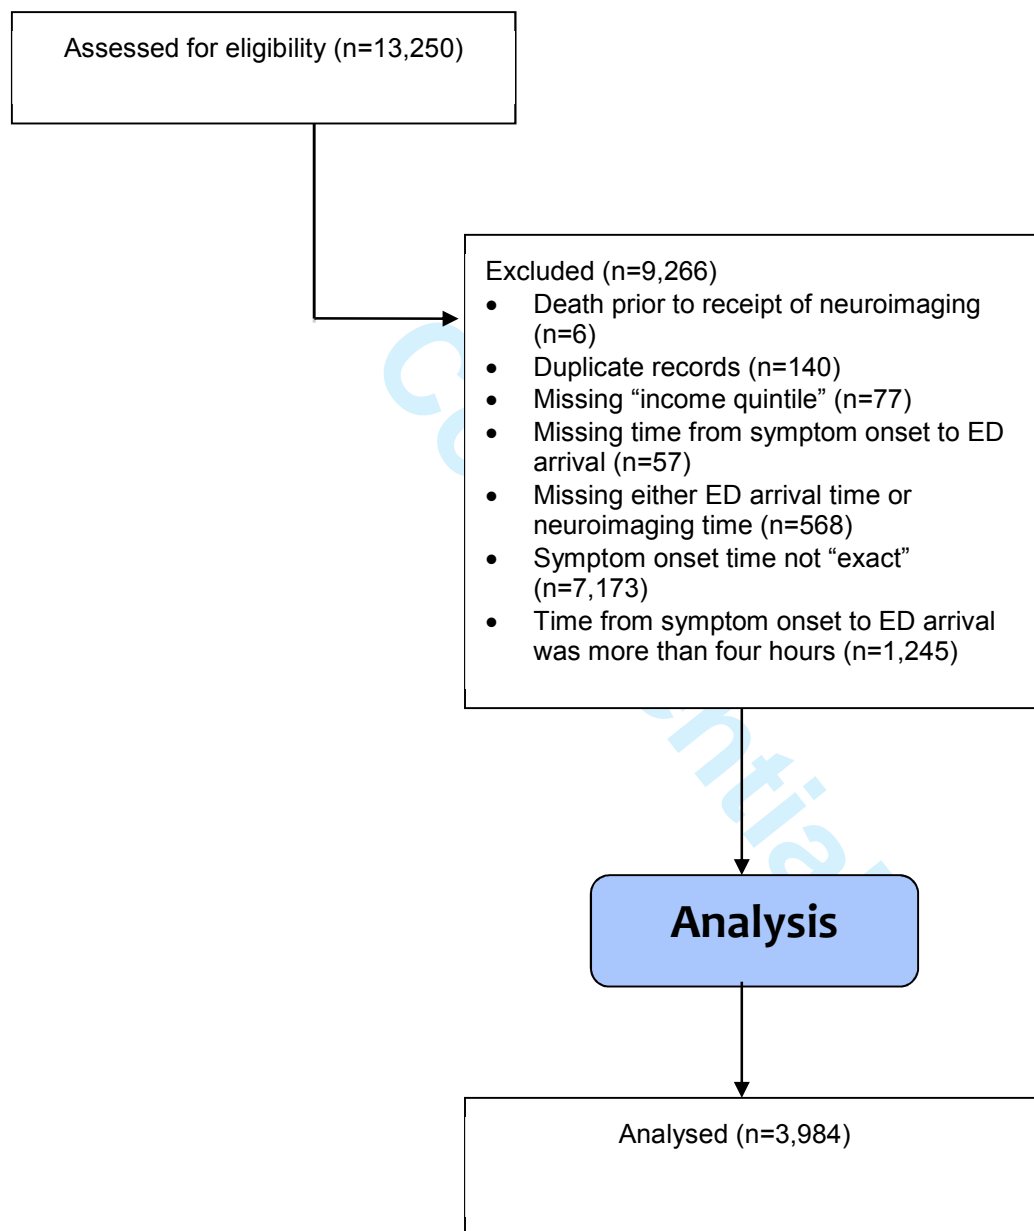

\* Cohort inclusion criteria: adult patients with stroke-like symptoms who presented to a hospital with neuroimaging capacity within four hours of symptom onset and whose time from symptom onset to presentation was exactly known.

**References:**

1. Jauch EC, Saver JL, Adams HP, Bruno A, Connors JJB, Demaerschalk BM, et al. Guidelines for the early management of patients with acute ischemic stroke: a guideline for healthcare professionals from the American Heart Association/American Stroke Association. *Stroke*. 2013. pp. 870–947.
2. Saver JL. Time Is Brain--Quantified. *Stroke*. 2005 Dec 22;37(1):263–6.
3. Alberts MJ, Latchaw RE, Selman WR, Shephard T, Hadley MN, Brass LM, et al. Recommendations for Comprehensive Stroke Centers.
4. Jauch EC, Saver JL, Adams HP, Bruno A, Connors JJB, Demaerschalk BM, et al. Guidelines for the early management of patients with acute ischemic stroke: a guideline for healthcare professionals from the American Heart Association/American Stroke Association. *Stroke*. 2013. pp. 870–947.
5. Schumacher HC, Bateman BT, Boden-Albala B, Berman MF, Mohr JP, Sacco RL, et al. Use of thrombolysis in acute ischemic stroke: analysis of the Nationwide Inpatient Sample 1999 to 2004. *Ann Emerg Med*. 2007 Aug;50(2):99–107.
6. Dale Birenbaum LWBGJF. Imaging in Acute Stroke. *Western Journal of Emergency Medicine*. California Chapter of the American Academy of Emergency Medicine (Cal/AAEM); 2011 Feb 1;12(1):67.
7. Collaboration S. Organised inpatient (stroke unit) care for stroke. *Cochrane Database Systematic Review*. 2007;CD000197.
8. Hyperacute | Canadian Best Practice Recommendations for Stroke Care [Internet]. [strokebestpractices.ca](http://www.strokebestpractices.ca). [cited 2014 Mar 13]. Available from: <http://www.strokebestpractices.ca/index.php/hyperacute-stroke-management/>
9. Group T. Tissue plasminogen activator for acute ischemic stroke. *New England Journal of Medicine*. 1995;333(24):1581–7.
10. Strbian D, Michel P, Ringleb P, Numminen H, Breuer L, Bodenant M, et al. Relationship between onset-to-door time and door-to-thrombolysis time: a pooled analysis of 10 dedicated stroke centers. *Stroke*. 2013 Sep 23;44(10):2808–13.
11. Bray BD, Campbell J, Cloud GC, Hoffman A, Tyrrell PJ, Wolfe CDA, et al. Bigger, Faster?: Associations Between Hospital Thrombolysis Volume and Speed of Thrombolysis Administration in Acute Ischemic Stroke. *Stroke*. 2013 Oct 21;44(11):e162–2.
12. Ferrari J, Knoflach M, Seyfang L, Lang W, Austrian Stroke Unit Registry

- 1  
2  
3 Collaborators. Differences in process management and in-hospital delays in  
4 treatment with iv thrombolysis. *PLoS One*. 2013;8(9):e75378.  
5  
6  
7 13. Fonarow GC, Smith EE, Saver JL, Reeves MJ, Bhatt DL, Grau-Sepulveda MV, et  
8 al. Timeliness of tissue-type plasminogen activator therapy in acute ischemic  
9 stroke: patient characteristics, hospital factors, and outcomes associated with  
10 door-to-needle times within 60 minutes. *Circulation*. 2011 Feb 22;123(7):750–8.  
11  
12 14. Kohrmann M, Schellinger PD, Breuer L, Dohrn M, Kuramatsu JB, Blinzler C, et al.  
13 Avoiding in hospital delays and eliminating the three-hour effect in thrombolysis  
14 for stroke. *Int J Stroke*. 2011 Dec;6(6):493–7.  
15  
16 15. Saver JL, Smith EE, Fonarow GC, Reeves MJ, Zhao X, Olson DM, et al. The  
17 “golden hour” and acute brain ischemia: presenting features and lytic therapy in  
18 >30,000 patients arriving within 60 minutes of stroke onset. *Stroke*. 2010  
19 Jul;41(7):1431–9.  
20  
21 16. Sauser K, Burke JF, Levine DA, Scott PA, Meurer WJ. Time to brain imaging in  
22 acute stroke is improving: secondary analysis of the INSTINCT trial. *Stroke*. 2014  
23 Jan;45(1):287–9.  
24  
25 17. Hall R, Khan F, O'Callaghan C, Kapral M, Levi J, Cullen A, et al. Ontario Stroke  
26 Evaluation Report 2014. [ontariostrokenetwork.ca](http://ontariostrokenetwork.ca). 2014 Nov.  
27  
28 18. Nilanont Y, Komoltri C, Saposnik G, Côté R, Di Legge S, Jin Y, et al. The  
29 Canadian Neurological Scale and the NIHSS: Development and Validation of a  
30 Simple Conversion Model. *Cerebrovasc Dis*. Karger Publishers; 2010;30(2):120–  
31 6.  
32  
33 19. Kelly AG, Hellkamp AS, Olson D, Smith EE, Schwamm LH. Predictors of rapid  
34 brain imaging in acute stroke: analysis of the Get With the Guidelines-Stroke  
35 program. *Stroke*. 2012 May;43(5):1279–84.  
36  
37 20. Sauser K, Levine DA, Nickles AV, Reeves MJ. Hospital variation in thrombolysis  
38 times among patients with acute ischemic stroke: the contributions of door-to-  
39 imaging time and imaging-to-needle time. *JAMA Neurol*. 2014 Sep;71(9):1155–  
40 61.  
41  
42 21. Sauser K, Burke JF, Levine DA, Scott PA, Meurer WJ. Time to Brain Imaging in  
43 Acute Stroke Is Improving.  
44  
45 22. Fonarow GC, Zhao X, Smith EE, Saver JL, Reeves MJ, Bhatt DL, et al. Door-to-  
46 Needle Times for Tissue Plasminogen Activator Administration and Clinical  
47 Outcomes in Acute Ischemic Stroke Before and After a Quality Improvement  
48 Initiative. *JAMA*. American Medical Association; 2014 Apr 23;311(16):1632–40.  
49  
50 23. Haršány M, Kadlecová P, Svirgelj V, Kőrv J, Kes VB, Vilionskis A, et al. Factors  
51 influencing door-to-imaging time: analysis of the safe implementation of  
52  
53  
54  
55  
56  
57  
58  
59  
60

- 1  
2  
3 treatments in Stroke-EAST registry. *J Stroke Cerebrovasc Dis*. 2014  
4 Sep;23(8):2122–9.  
5  
6  
7 24. Hodgson C. Emergency management of acute ischemic stroke in Canadian  
8 hospitals. *CMAJ*. 1998;159(6 Suppl):S15–8.  
9  
10 25. Ekundayo OJ, Saver JL, Fonarow GC, Schwamm LH, Xian Y, Zhao X, et al.  
11 Patterns of emergency medical services use and its association with timely stroke  
12 treatment: findings from Get With the Guidelines-Stroke. *Circ Cardiovasc Qual*  
13 *Outcomes*. 2013 May 1;6(3):262–9.  
14  
15 26. Kozera G, Chwojnicky K, Gójska-Grymajło A, Gąsecki D, Schminke U, Nyka WM,  
16 et al. Pre-hospital delays and intravenous thrombolysis in urban and rural areas.  
17 *Acta Neurologica Scandinavica*. 2012 Sep;126(3):171–7.  
18  
19 27. Saposnik G, Baibergenova A, O'donnell M, Hill MD. Hospital volume and stroke  
20 outcome Does it matter? *Neurology*. 2007.  
21  
22 28. Mikulik R, Kadlecová P, Czlonkowska A, Kobayashi A, Brozman M, Svigelj V, et  
23 al. Factors influencing in-hospital delay in treatment with intravenous  
24 thrombolysis. *Stroke*. 2012 Jun;43(6):1578–83.  
25  
26 29. Tekle WG, Chaudhry SA, Hassan AE, Peacock JM, Lakshminarayan K, Tsai A, et  
27 al. Utilization of intravenous thrombolysis in 3-4.5 hours: analysis of the  
28 Minnesota stroke registry. *Cerebrovasc Dis*. 2012;34(5-6):400–5.  
29  
30 30. Romano JG, Muller N, Merino JG, Forteza AM, Koch S, Rabinstein AA. In-  
31 hospital delays to stroke thrombolysis: paradoxical effect of early arrival.  
32 *Neurological Research*. 2007 Oct;29(7):664–6.  
33  
34 31. Gargano JW, Wehner S, Reeves MJ. Do presenting symptoms explain sex  
35 differences in emergency department delays among patients with acute stroke?  
36 *Stroke*. 2009 Apr;40(4):1114–20.  
37  
38 32. Di Carlo A, Lamassa M, Baldereschi M, Pracucci G, Basile AM, Wolfe CDA, et al.  
39 Sex differences in the clinical presentation, resource use, and 3-month outcome  
40 of acute stroke in Europe: data from a multicenter multinational hospital-based  
41 registry. *Stroke*. 2003 May;34(5):1114–9.  
42  
43 33. Yu RF, San Jose MCZ, Manzanilla BM, Oris MY, Gan R. Sources and reasons for  
44 delays in the care of acute stroke patients. *Journal of the Neurological Sciences*.  
45 Elsevier; 2002 Jul 15;199(1):49–54.  
46  
47 34. Hill MD, Coutts SB. Alteplase in acute ischaemic stroke: the need for speed. *The*  
48 *Lancet*. Elsevier; 2014 Nov 29;384(9958):1904–6.  
49  
50 35. Baker LC, Atlas SW, Afendulis CC. Expanded use of imaging technology and the  
51 challenge of measuring value. *Health Aff (Millwood)*. 2008 Nov;27(6):1467–78.  
52  
53  
54  
55  
56  
57  
58  
59  
60

- 1  
2  
3  
4  
5  
6  
7  
8  
9  
10  
11  
12  
13  
14  
15  
16  
17  
18  
19  
20  
21  
22  
23  
24  
25  
26  
27  
28  
29  
30  
31  
32  
33  
34  
35  
36  
37  
38  
39  
40  
41  
42  
43  
44  
45  
46  
47  
48  
49  
50  
51  
52  
53  
54  
55  
56  
57  
58  
59  
60
36. Ruff IM, Ali SF, Goldstein JN, Lev M, Copen WA, McIntyre J, et al. Improving Door-to-Needle Times.
  37. Ontario Stroke Network Ontario Stroke System - Ontario Stroke Network [Internet]. ontariostrokenetwork.ca. [cited 2015 Jun 16]. Available from: <http://ontariostrokenetwork.ca/about-the-osn/ontario-stroke-system-oss/>
  38. Get With The Guidelines®-Stroke Overview [Internet]. heart.org. [cited 2015 Jan 27]. Available from: [http://www.heart.org/HEARTORG/HealthcareResearch/GetWithTheGuidelines/Get-With-The-Guidelines-Stroke\\_UCM\\_306098\\_SubHomePage.jsp](http://www.heart.org/HEARTORG/HealthcareResearch/GetWithTheGuidelines/Get-With-The-Guidelines-Stroke_UCM_306098_SubHomePage.jsp)

Confidential

1  
2  
3  
4  
5  
6  
7  
8  
9  
10  
11  
12  
13  
14  
15  
16  
17  
18  
19  
20  
21  
22  
23  
24  
25  
26  
27  
28  
29  
30  
31  
32  
33  
34  
35  
36  
37  
38  
39  
40  
41  
42  
43  
44  
45  
46  
47  
48  
49  
50  
51  
52  
53  
54  
55  
56  
57  
58  
59  
60

**Figure 1: Time categories within which neuroimaging was completed vs. time from symptom onset to ED arrival**

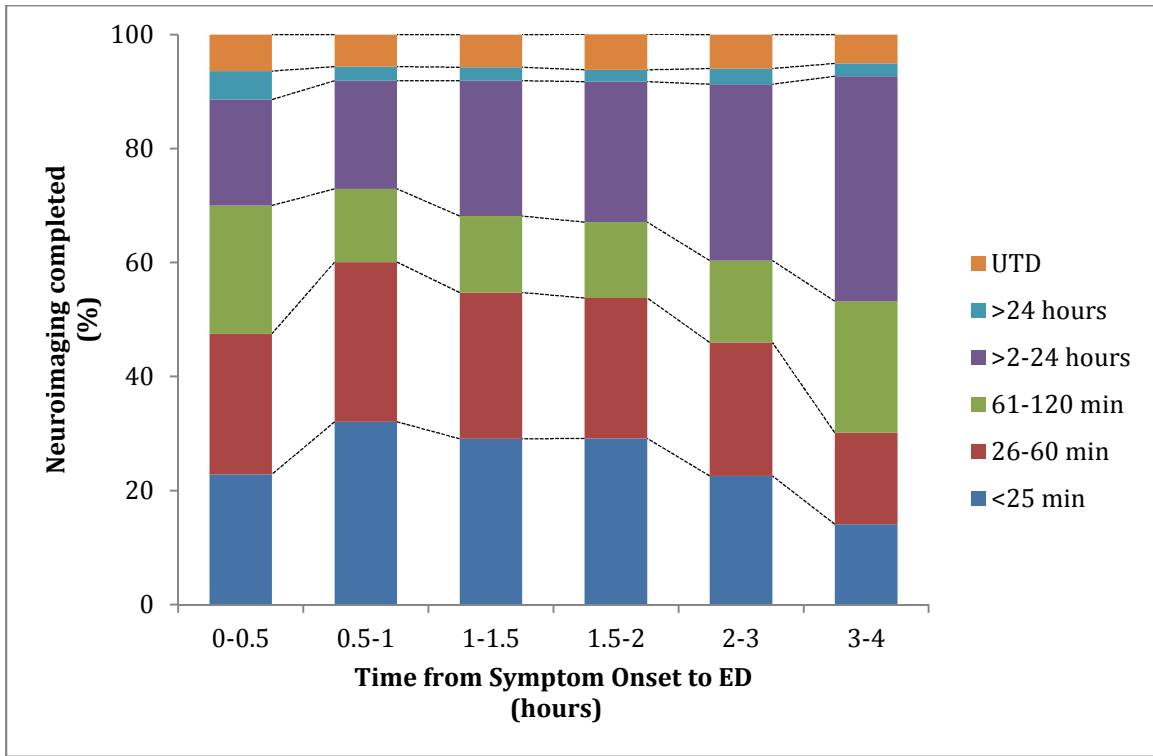

**Legend:** ED = emergency department; UTD = unable to determine.
